# Supplementary material
Source: Research Square preprint supplement (doi:10.21203/rs.3.rs-9180319/v1)
Supplement: Supplementary file 1 [file 4a352f57d49285be3cc5cb72.docx]

Supplementary Table 1. Analysis of variance by simple and combined effect of factors, of the variables Shoot Emission Time (SET) and Cutting Viability (CV), at a 95% significance level.

| **Variable** | **Effect** | **F** | **p-value** | **Significance** | **Coefficient of Variation** |
| --- | --- | --- | --- | --- | --- |
| Shoot emission time (SET) | Rooting agent (A) | 8.1048 | 0.0072 | ** | 5.3980% |
| Substrate (B) | 5.2402 | 0.0280 | * |
| Specie (C) | 1173.1179 | 0.0000 | *** |
| A:B | 7.3849 | 0.0100 | * |
| A:C | 3.2177 | 0.0518 | . |
| B:C | 4.4722 | 0.0184 | * |
| A:B:C | 3.9148 | 0.0289 | * |
| Cutting viability (CV) | A | 0.6000 | 0.4436 | n.s. | 16.4330% |
| B | 0.0122 | 0.9125 | n.s. |
| C | 41.9143 | 0.0000 | *** |
| A:B | 6.4776 | 0.0154 | * |
| A:C | 0.7469 | 0.4810 | n.s. |
| B:C | 0.6000 | 0.5542 | n.s. |
| A:B:C | 8.3143 | 0.0011 | ** |

n.s = not significant, . = trend toward significance, * = significant, ** = highly significant, *** = extremely significant

Supplementary Table 2. Analysis of variance by simple and combined effect of factors, of the variables Number of Shoots (NS), Shoot Length (SL), Number of Roots (NR), and Root Length (RL), under a significance level of 95%.

| **Variable** | **Effect** | **F** | | **P - value** | **Significance** | **Coefficient of variation** |
| --- | --- | --- | --- | --- | --- | --- |
| Number of shoots (NS) | Rooting agent (A) | | 0.0276 | 0.8690 | n.s. | 8.4634% |
| Substrate (B) | | 2.2347 | 0.1437 | n.s. |
| Specie (C) | | 21.7124 | 0.0000 | *** |
| A:B | | 7.1308 | 0.0113 | * |
| A:C | | 4.0043 | 0.0269 | * |
| B:C | | 2.3659 | 0.1083 | n.s. |
| A:B:C | | 7.9271 | 0.0014 | ** |
| Shoot length (SL) | A | 0.1413 | | 0.7092 | n.s. | 10.8408% |
| B | 1.5735 | | 0.2178 | n.s. |
| C | 301.9132 | | 0.0000 | *** |
| A:B | 8.3288 | | 0.0066 | ** |
| A:C | 3.2963 | | 0.0485 | * |
| B:C | 0.0888 | | 0.9152 | n.s. |
| A:B:C | 4.2173 | | 0.0226 | * |
| Number of roots (NR) | A | 0.0025 | | 0.9605 | n.s. | 13.1217% |
| B | 0.0166 | | 0.8983 | n.s. |
| C | 43.4557 | | 0.0000 | *** |
| A:B | 0.0790 | | 0.7803 | n.s. |
| A:C | 0.0329 | | 0.9677 | n.s. |
| B:C | 0.6384 | | 0.5340 | n.s. |
| A:B:C | 0.4037 | | 0.6708 | n.s. |
| Root length (RL) | A | 6.5405 | | 0.0149 | * | 9.6055% |
| B | 11.7803 | | 0.0015 | ** |
| C | 199.3480 | | 0.0000 | *** |
| A:B | 59.6985 | | 0.0000 | *** |
| A:C | 0.2080 | | 0.8132 | n.s. |
| B:C | 0.2618 | | 0.7711 | n.s. |
| A:B:C | 5.5171 | | 0.0081 | ** |

n.s = not significant, * = significant, ** = highly significant, *** = extremely significant

Supplementary Table 3. Analysis of variance by simple and combined effect of factors on the Vegetative Vigor Index (VVI) variable, at a significance level of 95%.

| **Variable** | **Effect** | **F** | **P - value** | **Significance** | **Coefficient of variation** |
| --- | --- | --- | --- | --- | --- |
| Vegetative vigor index (VVI) | Rooting agent (A) | 0.0836 | 0.7742 | n.s. | 15.6087% |
| Substrate (B) | 2.2435 | 0.1429 | n.s. |
| Specie (C) | 222.3454 | 0.0000 | *** |
| A:B | 3.9686 | 0.0540 | . |
| A:C | 0.4968 | 0.6126 | n.s. |
| B:C | 0.6469 | 0.5296 | n.s. |
| A:B:C | 6.1901 | 0.0049 | ** |

n.s = not significant, . = trend toward significance, ** = highly significant, *** = extremely significant
